# Supplementary material for: FOXP3+ T cells in uterine sarcomas are associated with favorable prognosis, low extracellular matrix expression and reduced YAP activation
Source: PubMed Central journal article supplement (PMC8604926; doi:10.1038/s41698-021-00236-6), 2021-11-19
Supplement: 41698_2021_236_MOESM1_ESM.pdf [file 41698_2021_236_MOESM1_ESM.pdf]

## **Supplementary Information**

**FOXP3+ T cells in uterine sarcomas are associated with favorable prognosis, low extracellular matrix expression and reduced YAP activation**

Okan Gultekin, Jordi Gonzalez-Molina, Elin Hardell, Lidia Moyano-Galceran, Nicholas Mitsios, Jan Mulder, Georgia Kokaraki, Anders Isaksson, Dhifaf Sarhan, Kaisa Lehti, and Joseph W. Carlson

|                                        | Leiomyosarcoma | Low grade endometrial stromal sarcoma | Undifferentiated uterine sarcoma | YWHAE-FAM22 translocated sarcoma | Leiomyoma |
|----------------------------------------|----------------|---------------------------------------|----------------------------------|----------------------------------|-----------|
| <b>Number of cases</b>                 | 13             | 16                                    | 26                               | 3                                | 13        |
| <b>Age at diagnosis</b> (mean, years)  | 61.4           | 54.4                                  | 62.2                             | 59.1                             |           |
| <b>Stage</b>                           |                |                                       |                                  |                                  |           |
| 1                                      | 6              | 12                                    | 10                               | 3                                |           |
| 2                                      | 0              | 3                                     | 3                                | 0                                |           |
| 3                                      | 0              | 1                                     | 4                                | 0                                |           |
| 4                                      | 4              | 0                                     | 2                                | 0                                |           |
| N/A                                    | 3              | 0                                     | 7                                | 0                                |           |
| <b>Time to last follow up</b> (months) | 59.8           | 96.0                                  | 41.6                             | 87.9                             |           |
| <b>Status at last follow up</b>        |                |                                       |                                  |                                  |           |
| Alive                                  | 2              | 13                                    | 5                                | 1                                |           |
| Deceased                               | 11             | 3                                     | 21                               | 2                                |           |

### Supplementary Table 1

Clinical Data of Cohort including age at diagnosis, disease stage at diagnosis, and survival.

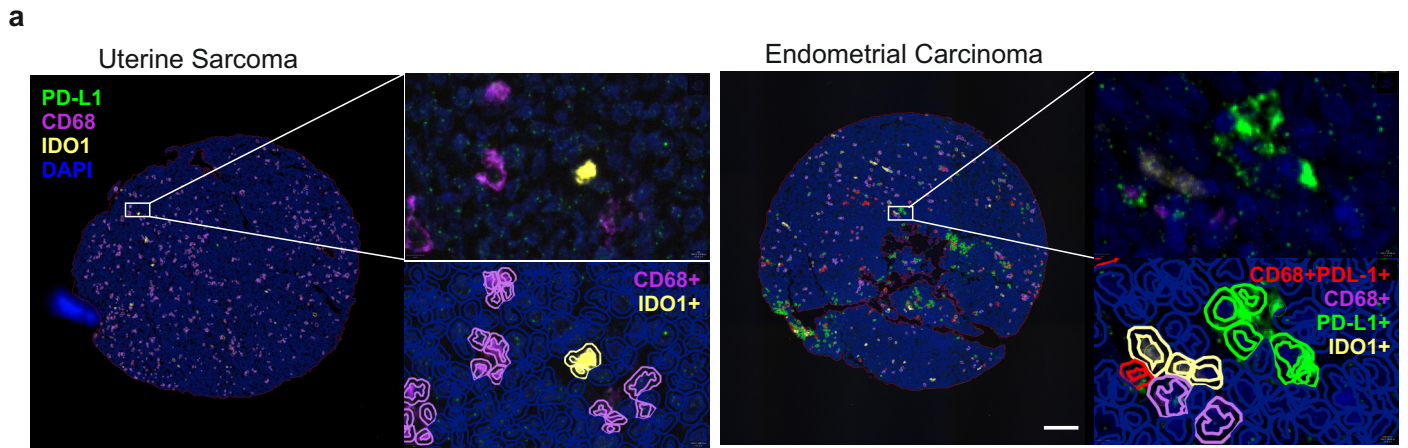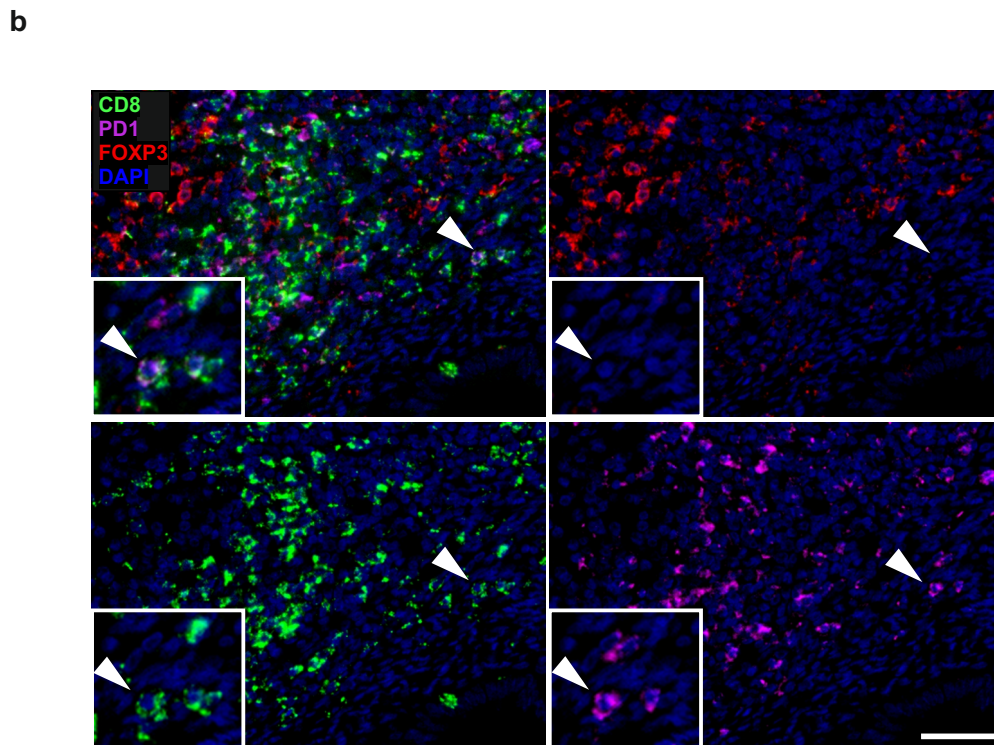

### Supplementary Figure 1

PD-L1 expression and CD8+PD1+ cells were detected in control endometrial carcinoma tissues but not in uterine sarcoma. **a**, Example images of PD-L1 staining and QuPath-based cell type detection (bottom right) showing PD-L1+ cells in endometrial carcinoma tissue. Scale bar indicates 100  $\mu\text{m}$ . **b**, Example images of endometrial carcinoma tissue presenting CD8+PD1+ cells. Arrowhead indicates an example of a CD8+PD1+ cell. Scale bar indicates 40  $\mu\text{m}$ .

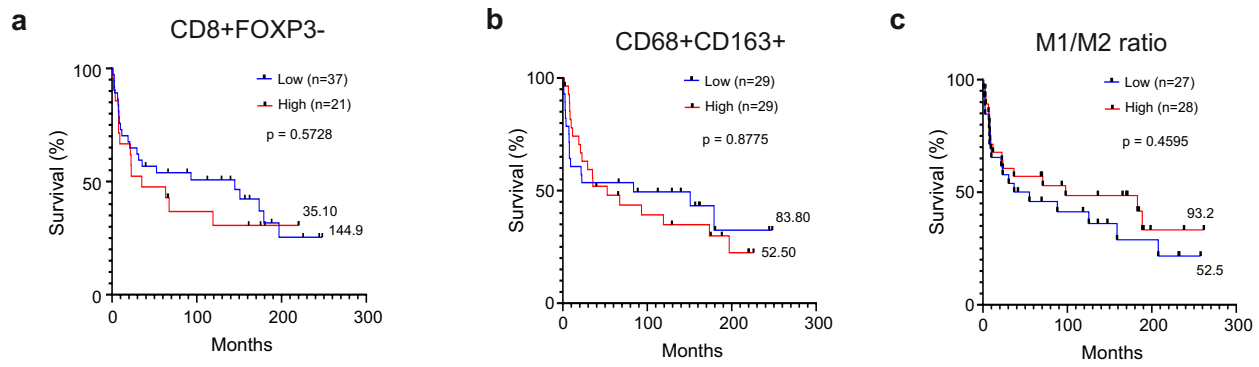

## Supplementary Figure 2

Kaplan-Meier curves showing infiltration of CD8+FOXP3- (**a**), M2-like macrophages (CD68+CD163-) (**b**), and M1/M2-like macrophage ratio (**c**), which are not prognostic in uterine sarcomas. Median survival is indicated for each patient group.

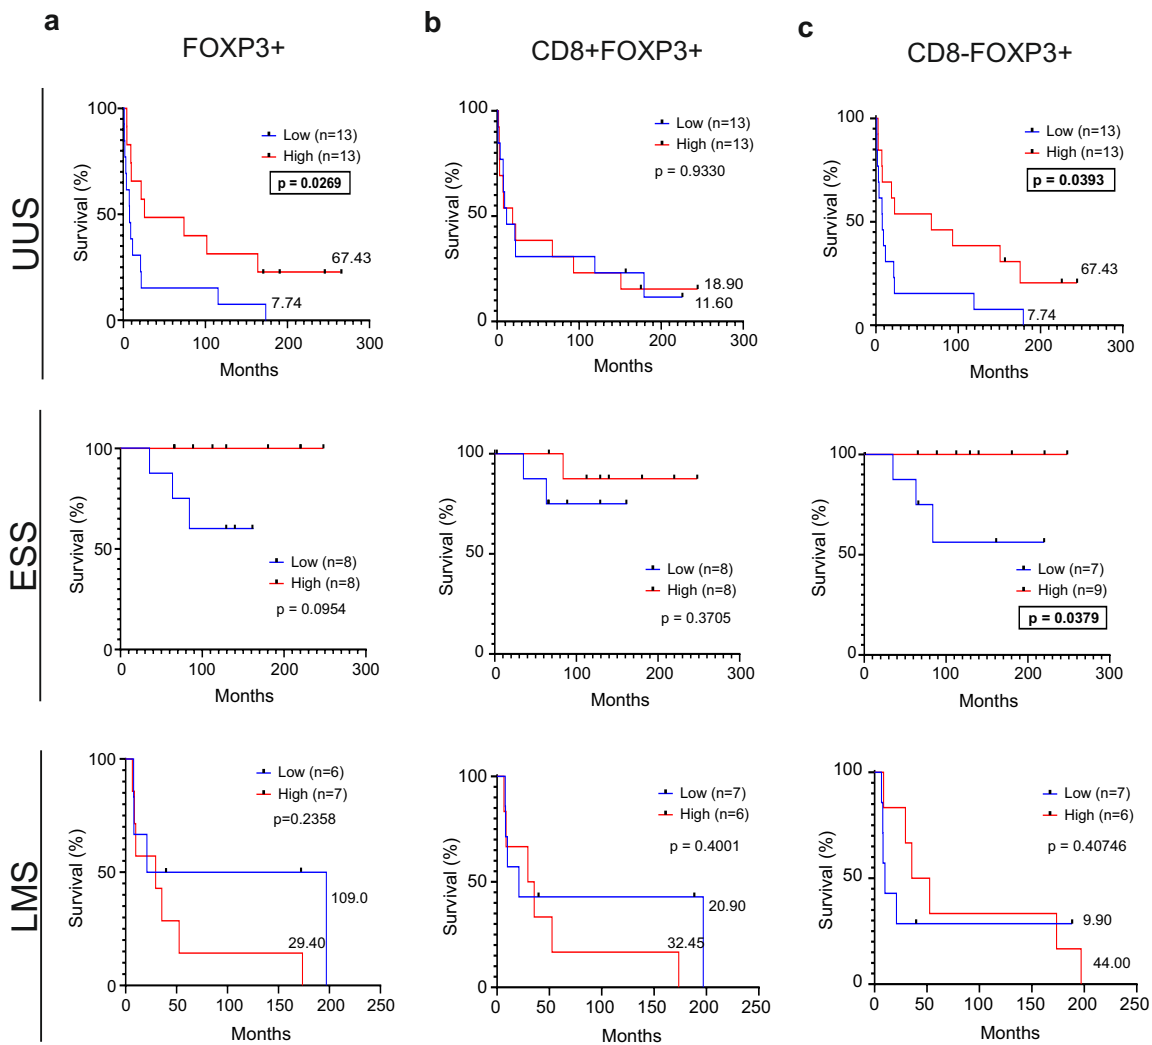

### Supplementary Figure 3

FOXP3+ cell density is associated with better survival in UUS and ESS. **a-c**, Kaplan-Meier curves showing overall survival for the indicated FOXP3+ cell subgroups in UUS, ESS, and LMS patients. Median Survival is indicated for each group.

| Tumor type | Marker      | Group | n  | Median survival (months) | P value (log-rank) |
|------------|-------------|-------|----|--------------------------|--------------------|
| UUS        | CD68+CD163- | High  | 13 | 67.43                    | <b>0.0296</b>      |
|            |             | Low   | 13 | 7.737                    |                    |
|            | CD68+CD163+ | High  | 14 | 45.06                    | 0.0509             |
|            |             | Low   | 12 | 7.582                    |                    |
| ESS        | CD68+CD163- | High  | 8  | Undefined                | 0.9863             |
|            |             | Low   | 8  | Undefined                |                    |
|            | CD68+CD163+ | High  | 8  | Undefined                | 0.7377             |
|            |             | Low   | 8  | Undefined                |                    |
| LMS        | CD68+CD163- | High  | 6  | 22.03                    | 0.7196             |
|            |             | Low   | 7  | 29.4                     |                    |
|            | CD68+CD163+ | High  | 6  | 18.9833                  | 0.1283             |
|            |             | Low   | 7  | 52.5                     |                    |

### Supplementary Table 2

Summary of median survival and P values for patients grouped according to their M1-like or M2-like macrophage infiltration in ESS, UUS, and LMS tumors.

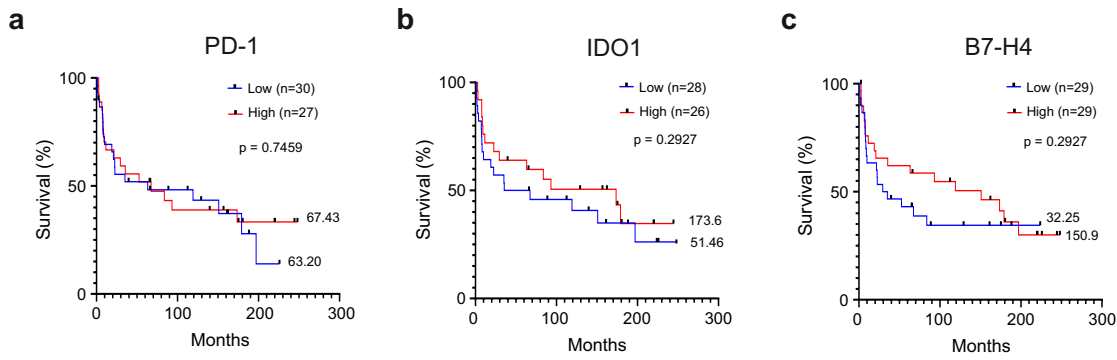

#### Supplementary Figure 4

Kaplan-Meier curves of patient groups based on expression of immune regulatory proteins PD-1 (a), IDO1 (b), and B7-H4 (c) showing that the general expression of these proteins does not have prognostic value in uterine sarcomas. Median Survival is indicated for each group.

| Tumor type | Marker | Group | n  | Median survival (months) | P value (log-rank) |
|------------|--------|-------|----|--------------------------|--------------------|
| UUS        | IDO1   | High  | 12 | 17.15                    | 0.2063             |
|            |        | Low   | 13 | 7.427                    |                    |
|            | B7H4   | High  | 13 | 93.21                    | 0.0606             |
|            |        | Low   | 13 | 7.737                    |                    |
|            | PD-1   | High  | 13 | 21.59                    | 0.7571             |
|            |        | Low   | 13 | 9.197                    |                    |
| ESS        | IDO1   | High  | 9  | Undefined                | 0.47               |
|            |        | Low   | 7  | Undefined                |                    |
|            | B7H4   | High  | 8  | Undefined                | 0.6148             |
|            |        | Low   | 8  | Undefined                |                    |
|            | PD-1   | High  | 7  | Undefined                | 0.4319             |
|            |        | Low   | 9  | Undefined                |                    |
| LMS        | IDO1   | High  | 5  | 173.567                  | 0.3577             |
|            |        | Low   | 5  | 9.9                      |                    |
|            | B7H4   | High  | 7  | 20.9                     | 0.6169             |
|            |        | Low   | 7  | 29.4                     |                    |
|            | PD-1   | High  | 6  | 44                       | 0.5934             |
|            |        | Low   | 7  | 9.9                      |                    |

### Supplementary Table 3

Summary of median survival and P values for patient grouped according to their immune regulatory protein expression in ESS, UUS, and LMS tumors.



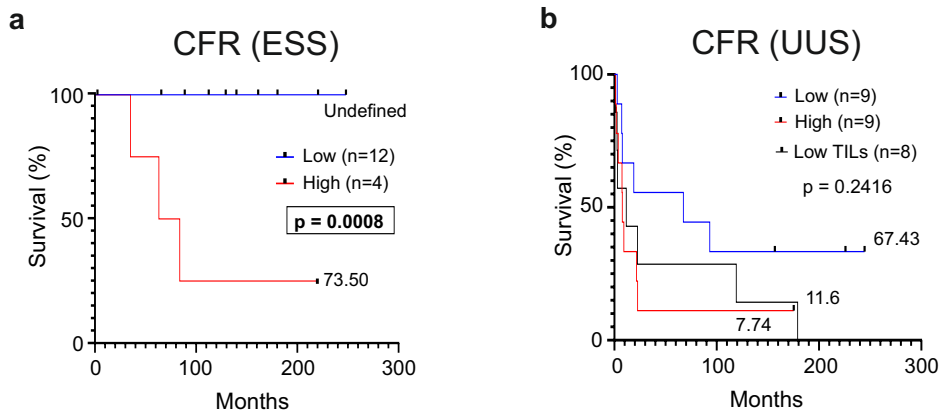

### Supplementary Figure 5

High CD8+FOXP3-/FOXP3+ ratio (CFR) is associated with poor survival. Kaplan-Meier curves of ESS (a) and UUS (b) patients grouped based on their CFR. UUS tumours include a low-TIL group defined as tumors with T cell infiltration below the 40th percentile of all tumors analyzed. Median Survival is indicated for each group.

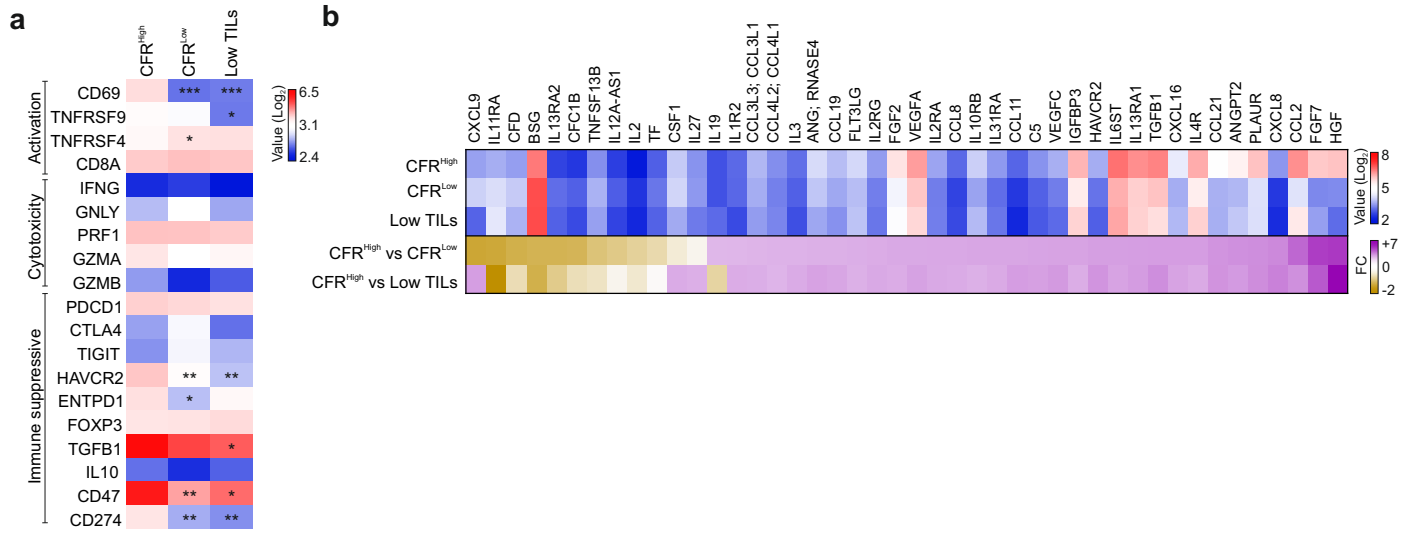

### Supplementary Figure 6

Differential expression of immune marker (a) and cytokine genes (b) between CFR<sup>High</sup> and CFR<sup>Low</sup> or Low TILs (FC, fold change). Significance is indicated as \*(P < 0.05), \*\* (P < 0.01), \*\*\* (P < 0.001)

**a**

### CD8+FOXP3- High vs Low

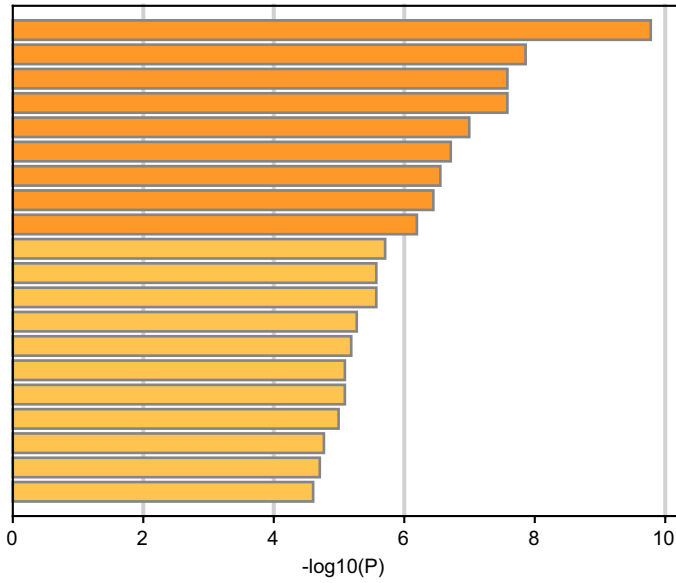

GO:0009611: response to wounding  
GO:0030029: actin filament-based process  
ko05205: Proteoglycans in cancer  
GO:0070848: response to growth factor  
GO:0007159: leukocyte cell-cell adhesion  
GO:0006936: muscle contraction  
GO:0007507: heart development  
GO:0051345: positive regulation of hydrolase activity  
GO:0031952: regulation of protein autophosphorylation  
M5884: NABA CORE MATRISOME  
GO:0071634: regulation of transforming growth factor beta production  
GO:0045055: regulated exocytosis  
GO:0030198: extracellular matrix organization  
WP3888: VEGFA-VEGFR2 Signaling Pathway  
GO:0007229: integrin-mediated signaling pathway  
GO:0032870: cellular response to hormone stimulus  
GO:0045862: positive regulation of proteolysis  
ko04530: Tight junction  
R-HSA-109582: Hemostasis  
WP545: Complement Activation

**b**

### FOXP3+ High vs Low

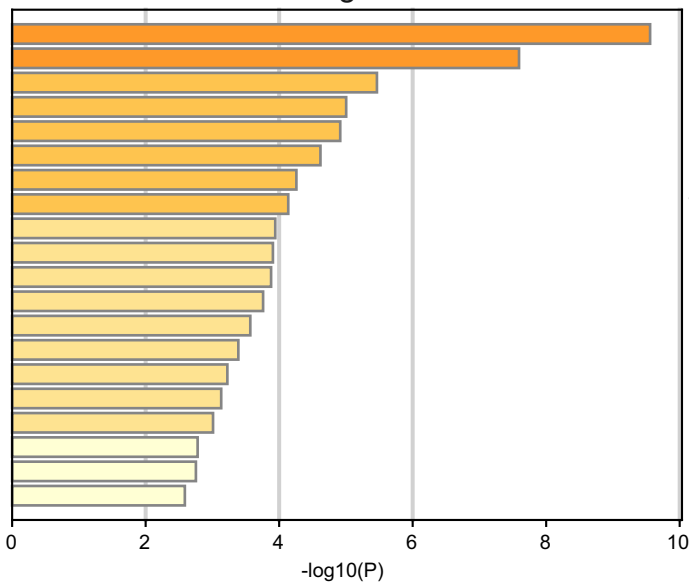

R-HSA-1474244: Extracellular matrix organization  
GO:0031589: cell-substrate adhesion  
GO:0030335: positive regulation of cell migration  
ko04810: Regulation of actin cytoskeleton  
R-HSA-2022090: Assembly of collagen fibrils and other multimeric structures  
GO:0031581: hemidesmosome assembly  
GO:0000904: cell morphogenesis involved in differentiation  
WP3678: Amplification and Expansion of Oncogenic Pathways as Metastatic Traits  
GO:0001667: amoeboid-type cell migration  
GO:0051345: positive regulation of hydrolase activity  
GO:0030029: actin filament-based process  
GO:0060113: inner ear receptor cell differentiation  
GO:1900746: regulation of vascular endothelial growth factor signaling pathway  
GO:0030705: cytoskeleton-dependent intracellular transport  
GO:0050678: regulation of epithelial cell proliferation  
GO:0090066: regulation of anatomical structure size  
GO:0071634: regulation of transforming growth factor beta production  
GO:0060425: lung morphogenesis  
M92: PID ANGIOPOIETIN RECEPTOR PATHWAY  
GO:0045862: positive regulation of proteolysis

## Supplementary Figure 7

Tumors with distinct CD8+ and FOXP3+ cell infiltration show differential expression of extracellular matrix-related genes. **a**, **b**, Metascape pathway analysis reveals the most significantly altered pathways between tumors with high and low CD8+ cell infiltration (**a**), and FOXP3+ cell infiltration (**b**).

| Antibody            | Company    | Product No. | Dilution | Technique |
|---------------------|------------|-------------|----------|-----------|
| CD8                 | Dako       | M 7103      | 1 : 100  | IF        |
| FOXP3               | EuroMAbNET | 236A/E7     | none     | IF        |
| PDCD1 / CD279 (PD1) | HPA        | HPA035981   | 1 : 250  | IF        |
| CD68                | Dako       | M 0876      | 1 : 100  | IF        |
| CD163               | HPA        | HPA046404   | 1 : 1600 | IF        |
| PDL1                | Dako       | M 3653      | 1 : 100  | IF        |
| IDO1                | HPA        | HPA023149   | 1 : 50   | IF        |
| VTCN1 (B7-H4)       | HPA        | HPA054200   | 1 : 70   | IF        |
|                     |            |             |          |           |
| CD4                 | Ventana    | 790-4423    | none     | IHC       |
| Collagen I          | Abcam      | ab34719     | 1 : 200  | IHC       |
| Collagen VI         | Abcam      | ab6588      | 1 : 200  | IHC       |
| Fibronectin         | Sigma      | F3649       | 1 : 200  | IHC       |
| MMP14               | Millipore  | MAB3328     | 1 : 100  | IHC       |
| YAP1                | Abcam      | ab56701     | 1 : 1000 | IHC       |

#### Supplementary Table 4

Summary of the details of the antibodies used for immunofluorescence (IF) and immunohistochemistry (IHC). Human protein atlas is represented as HPA.

### **Supplementary Data 1**

List of differentially expressed genes (> 2-fold) between UUS tumors based on CFR groups and Low TILS

### **Supplementary Data 2**

List of differentially expressed genes between UUS tumors with high and low infiltration of M1-like macrophages.
